# Supplementary material
Source: Springer Nature journal article supplement (https://www.springermedizin.de/resource/supplementary/12891_2013_2014_MOESM2_ESM.pdf/9509790)

**WT AIA****TG AIA****WT CTR**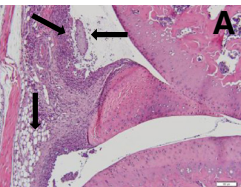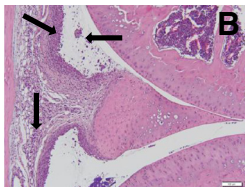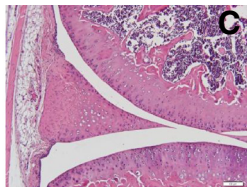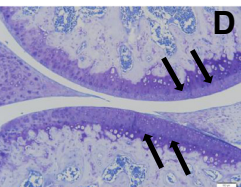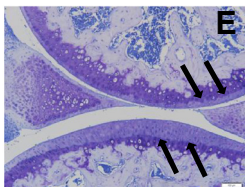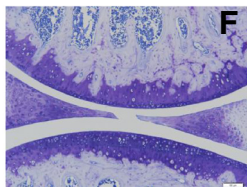**G**

NS

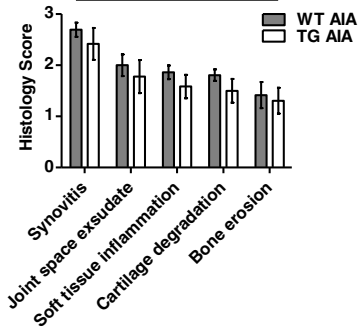**H**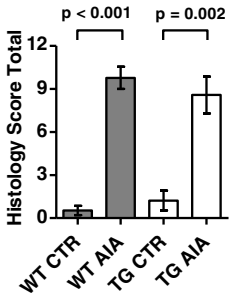

Supplement: MOESM2 [file 9509790]
